# Supplementary material
Source: Springer Nature journal article supplement (https://www.springermedizin.de/resource/supplementary/12958_2007_420_MOESM1_ESM.pdf/9567840)

**A**

### Hypothalamus

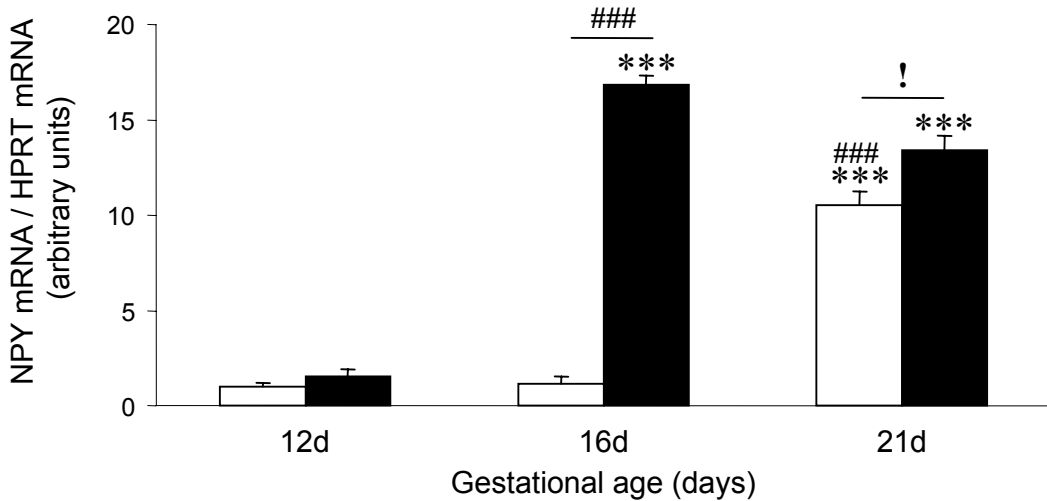**B**

### Placenta

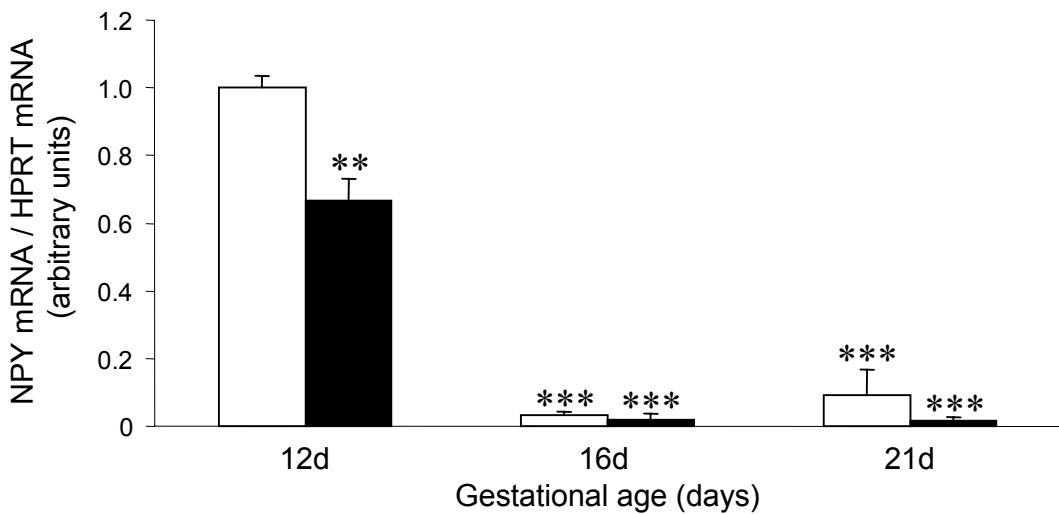

□ Ad libitum  
■ Food-restricted

Supplement: MOESM1 [file 9567840]
